# Supplementary material for: Continuous high-resolution midlatitude-belt simulations for July–August 2013 with WRF
Source: Copernicus journal article supplement (doi:10.5194/gmd-10-2031-2017), 2017-05-31
Supplement: Supplementary file 1 [file gmd-10-2031-2017-supplement.pdf]

Supplement of Geosci. Model Dev., 10, 2031–2055, 2017  
<http://www.geosci-model-dev.net/10/2031/2017/>  
doi:10.5194/gmd-10-2031-2017-supplement  
© Author(s) 2017. CC Attribution 3.0 License.

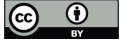

Geoscientific  
Model Development

Open Access

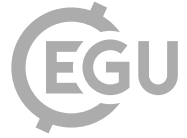

*Supplement of*

## **Continuous high-resolution midlatitude-belt simulations for July–August 2013 with WRF**

**Thomas Schwitalla et al.**

*Correspondence to:* Thomas Schwitalla (thomas.schwitalla@uni-hohenheim.de)

The copyright of individual parts of the supplement might differ from the CC-BY 3.0 licence.

## 1 namelist.input used for the WRF simulations

The following namelist.input was used for both simulations. For the LOWRES simulation, the time step, grid resolution, and number of grid cells need to be adjusted. In addition, `cu_physics` needs to be set to zero.

```
&time_control
5  run_days           = 0,
   run_hours          = 0,
   run_minutes        = 0,
   run_seconds        = 0,
   start_year         = 2013
10  start_month       = 07
   start_day          = 01
   start_hour         = 0
   start_minute       = 0
   start_second       = 0
15  end_year          = 2013
   end_month          = 09
   end_day            = 01
   end_hour           = 0
   end_minute         = 0
20  end_second        = 0
   interval_seconds   = 21600,
   input_from_file    = .true.
   history_interval    = 30,
   frames_per_outfile = 1
25  restart           = .false. ,
   restart_interval   = 720,
   override_restart_timers = .true.
   io_form_history     = 11,
   io_form_restart     = 11,
30  io_form_input     = 102,
   io_form_boundary    = 11,
   io_form_auxinput1   = 11,
   debug_level         = 0,
   nocolons= .true.
35  io_form_auxinput4 = 11
   auxinput4_inname    = "wrflowinp_d<domain>"
   auxinput4_interval  = 360
   auxhist23_outname='wrfpress_d<domain>_<date>'
   io_form_auxhist23 = 11
40  auxhist23_interval = 30,
   frames_per_auxhist23 = 1
   diag_print=1,
   auxhist2_outname='afwa_d<domain>_<date>'
   io_form_auxhist2 = 11
45  auxhist2_interval = 15,
   frames_per_auxhist2 = 1
   use_netcdf_classic =.true.
```

```

/

&diags
p_lev_diags = 1
5 num_press_levels = 7
  press_levels = 92500, 85000, 70000, 50000, 30000, 20000, 10000
  use_tot_or_hyd_p = 2
/

&domains
10 time_step = 10
  time_step_fract_num = 0
  time_step_fract_den = 1
  max_dom = 1
  s_we = 1
15 e_we = 12000
  s_sn = 1
  e_sn = 1500
  s_vert = 1
  e_vert = 57
20 eta_levels = 1.000,0.997,0.993,0.989,0.983,0.972,0.962,0.952
  ,0.942,0.932,0.917,0.903,0.889,0.875,0.852,0.826,0.799,0.771,
  0.748,0.725,0.7,0.678,0.653,0.628,0.590,0.557,0.515,0.480,
  0.445,0.410,0.375,0.340,0.305,0.280,0.25,0.219,0.191,0.174,
  0.157,0.142,0.128,0.114,0.102,0.091,0.080,0.070,0.061,0.052
25 ,0.044,0.037,0.030,0.024,0.018,0.013,0.008,0.003,0.000,
  num_metgrid_levels = 138,
  p_top_requested = 1000,
  dx = 3335.324,
  dy = 3335.324,
30 grid_id = 1,
  parent_id = 1,
  i_parent_start = 1,
  j_parent_start = 1,
  parent_grid_ratio = 1,
35 parent_time_step_ratio = 1,
  feedback = 1,
  smooth_option = 0,
  use_surface = . false .,
  sfc_p_to_sfc_p = . false .
40 use_adaptive_time_step = . false .
  step_to_output_time = . true .
  target_cfl = 1.3,
  max_step_increase_pct = 50,
  starting_time_step = -1,
45 max_time_step = 15,
  min_time_step = 1,
/

&physics

```

```

    sst_update           = 1,
    mp_physics           = 10
    ra_lw_physics        = 4
    ra_sw_physics        = 4
5   radt                = 3
    sf_sfclay_physics   = 1
    sf_surface_physics  = 2,
    bl_pbl_physics      = 1,
    bldt                = 0,
10  topo_wind           = 1
    cu_physics           = 0,
    cudt                = 0,
    kfeta_trigger        = 2,
    isfflx              = 1,
15  ifsnow              = 1,
    icloud              = 1,
    surface_input_source = 1,
    num_soil_layers      = 4,
    mp_zero_out          = 0,
20  sf_urban_physics    = 0,
    maxiens             = 1,
    maxens              = 3,
    maxens2             = 3,
    maxens3             = 16,
25  ensdim              = 144,
    slope_rad           = 0,
    topo_shading         = 0,
    num_land_cat         = 21,
    iz0tln              = 1,
30  shcu_physics        = 3
    sf_ocean_physics    = 0
    usemonalb = . true .
    do_radar_ref = 1,
    hail_opt      = 1,
35  /

    &afwa
    afwa_diag_opt=1
    afwa_severe_opt=1
40  afwa_ptype_opt=1
    afwa_radar_opt=1
    afwa_vis_opt=1
    afwa_cloud_opt=1
    /
45  &dynamics
    w_damping           = 1,
    diff_opt            = 1,
    km_opt              = 4,

```

```

gwd_opt           = 0,
diff_6th_opt     = 2,
diff_6th_factor  = 0.12,
base_temp        = 290.
5 damp_opt       = 3,
zdamp            = 5000.,
dampcoef         = 0.2,
khdif            = 0,
kvdif           = 0,
10 non_hydrostatic = . true .,
moist_adv_opt    = 1,
scalar_adv_opt   = 1,
epssm           = 0.5
/
15

&bdy_control
spec_bdy_width  = 5,
spec_zone       = 1,
20 relax_zone   = 4,
specified       = . true .,
nested          = . false .,
periodic_x      = . true .
/
25

&namelist_quilt
nio_tasks_per_group = 0,
nio_groups = 1,
/

```
